# Supplementary material
Source: publisher figshare collection journal article supplement (https://tandf.figshare.com/ndownloader/files/15540467)
Supplement: Supplementary file 1 [file 15540467]

**Supplementary Information For**

**Looking at organic pollutants (OPs) signatures in littoral sediments to assess the influence of a local urban source at the whole lake scale**

Nathalie Lécrivain a*, Victor Frossard b, Emmanuel Naffrechoux c, Bernard Clément a

a Univ Lyon, Université Claude Bernard Lyon 1, CNRS, ENTPE, UMR5023 LEHNA, F-69518, Vaulx-en-Velin, France

b Université Savoie Mont-Blanc, UMR 42 CARRTEL, 73376 Le Bourget du Lac, France

c Université Savoie Mont-Blanc, LCME, 73376 Le Bourget du Lac, France

**Corresponding author**

* Nathalie Lécrivain; E-mail: nathalie.lecrivain@entpe.fr, Tel: +33 472 047 289

**Contents**:

**Table S1.** GPS coordinates of the ten study sites (S1-S10), the reference site and the tributaries (T1-T4) outlets.

**Table S2.** Organic matter abundance (%), PCB and PAH contents (μg.kg-1 OM) in the sediments of the ten littoral sites.

**Table S3.** Total content (μg.kg-1 OM), similarity indexes and ratios for each site based on PCB and PAH profiles in the 10 study sites in Lake Bourget and in reference site.

**Method S1.** Dissecting OP profiles of remote lakes.

**Literature**

**Table S1.** GPS coordinates of the ten study sites (S1-S10), the reference site and the tributaries (T1-T4) outlets.

| Site code | GPS coordinates |
| --- | --- |
| S1 | 45°45’20.16’’N. 5°50’17.987’’E |
| S2 | 45°47’42.936 ‘’N. 5°49’21.575’’E |
| S3 | 45°47’57.228”N. 5°50’44.412”E |
| S4 | 45°45’14.832’’N. 5°52’35.724’’E |
| S5 | 45°42’5.184’’N. 5°52’55.56’’E |
| S6 | 45°41’40.452’’N. 5°53’10.715’’E |
| S7 | 45°41’33.828’’N. 5°53’15.107’’E |
| S8 | 45°41’19.032’’N. 5°53’39.3’’E |
| S9 | 45°40’3.288’’N. 5°53’36.276’’E |
| S10 | 45°39’7.92’’N. 5°53’11.184’’E |
| Reference site | 45°41’38.8’’N. 5°53’34.1’’E |
| T1 | 45°39’21.9’’N. 5°52’3.2’’E |
| T2 | 45°40’3.9’’N. 5°53’36.9’’E |
| T3 | 45°41’33.9’’N. 5°53’18.9’’E |
| T4 | 45°42’4.9’’N. 5°53’0.7’’E |

**Table S2.** Organic matter (OM) abundance (%), PCB and PAH contents (μg.kg-1 OM) in the sediments of the ten littoral sites.

| Sites | | S1 | S2 | S3 | S4 | S5 | S6 | S7 | S8 | S9 | S10 |
| --- | --- | --- | --- | --- | --- | --- | --- | --- | --- | --- | --- |
| OM (%) | | 1.5 | 3.8 | 1.7 | 1.8 | 1.3 | 2.8 | 2 | 2.4 | 4 | 1.8 |
| PCBs (μg.kg-1 OM) | PCB-28 | 525.33 | ND | ND | ND | ND | ND | 80.00 | ND | ND | ND |
| PCB-52 | 178.00 | 56.58 | 148.24 | 116.11 | 173.85 | 73.93 | 298.00 | 108.33 | 47.00 | 100.56 |
| PCB-101 | 269.33 | 58.42 | 123.53 | 108.33 | 154.62 | 157.14 | 331.50 | 78.33 | 56.50 | 100.00 |
| PCB-118 | ND | ND | ND | ND | ND | 202.50 | 247.00 | 3.75 | ND | ND |
| PCB-138 | 500.00 | 66.32 | 187.65 | 181.67 | 260.00 | 345.00 | 647.00 | 139.17 | 82.75 | 131.11 |
| PCB-153 | 322.67 | 16.84 | 32.94 | 35.56 | 60.00 | 143.57 | 73.00 | 31.25 | 75.00 | 127.22 |
| PCB-180 | 4.00 | ND | ND | 15.00 | 9.23 | 155.36 | 1224.50 | 11.67 | 16.50 | 48.33 |
| PAHs (μg.kg-1 OM) | Flu | 28.00 | 20.26 | 3.53 | 6.67 | 23.85 | 602.14 | 95.50 | 0.83 | 15.00 | 7.22 |
| Phe | 58.67 | 23.16 | 131.76 | 185.56 | 964.62 | 3515.71 | 1689.50 | 132.92 | 361.50 | 207.78 |
| Ant | 0.00 | 4.47 | 0.00 | 0.00 | 1.54 | 2594.64 | 245.00 | 0.00 | 56.75 | 51.11 |
| Fla | 28.00 | 93.16 | 28.82 | 315.00 | 2409.23 | 18185.36 | 4516.00 | 21.67 | 1289.00 | 963.33 |
| Pyr | 37.33 | 2670.79 | 9.41 | 8.89 | 109.23 | 42553.57 | 4032.50 | 6.67 | 1201.25 | 762.78 |
| BaA | 14.67 | 83.42 | 0.00 | 18.33 | 520.77 | 15520.36 | 4173.50 | 4.58 | 1874.00 | 1254.44 |
| Chr | 12.00 | 37.37 | 0.00 | 87.22 | 1283.85 | 7486.79 | 2142.00 | 0.00 | 841.25 | 533.33 |
| BbF | 186.67 | 250.79 | 15.29 | 176.67 | 1543.85 | 7895.00 | 4263.00 | 18.75 | 1569.25 | 806.67 |
| BkF | 9.33 | 32.37 | 1.18 | 2.22 | 83.08 | 3878.57 | 1345.00 | 0.83 | 539.75 | 319.44 |
| BaP | 10.67 | 60.00 | 0.59 | 1.11 | 8.46 | 9210.00 | 2422.00 | 0.42 | 1075.25 | 644.44 |
| BghiP | 18.00 | 78.16 | 2.94 | 8.33 | 244.62 | 6156.79 | 2048.50 | 2.08 | 1001.50 | 546.11 |
| DbahA | 6.67 | 17.37 | 1.18 | 1.11 | 30.00 | 1535.71 | 510.50 | 0.83 | 92.25 | 136.11 |
| IP | 23.33 | 100.79 | 4.12 | 3.89 | 29.23 | 4685.36 | 1545.50 | 2.92 | 645.00 | 223.89 |

**Table S3.** Total contents (μg.kg-1 OM), similarity indexes and ratios based on PCB and PAH profiles in the 10 study sites in Lake Bourget and in reference site.

|  | Total content (μg.kg-1 OM) | | Similarity indexes | | Ratio values | |
| --- | --- | --- | --- | --- | --- | --- |
| Site | PCB | PAH | PCB | PAH | ratioPCB | ratioPAH |
| S1 | 1799 | 433 | 0.65 | 0.51 | 0.46 | 0.26 |
| S2 | 198 | 3472 | 0.57 | 0.33 | 0.41 | 0.04 |
| S3 | 492 | 198 | 0.55 | 0.35 | 0.40 | 0.83 |
| S4 | 457 | 815 | 0.59 | 0.43 | 0.34 | 0.62 |
| S5 | 658 | 7253 | 0.58 | 0.52 | 0.35 | 0.47 |
| S6 | 1078 | 123820 | 0.78 | 0.75 | 0.11 | 0.20 |
| S7 | 2901 | 29028 | 0.68 | 0.89 | 0.16 | 0.23 |
| S8 | 372 | 192 | 0.60 | 0.34 | 0.38 | 0.81 |
| S9 | 278 | 10562 | 0.80 | 0.89 | 0.22 | 0.16 |
| S10 | 508 | 6457 | 0.82 | 0.90 | 0.25 | 0.19 |
| Mean ±SD | 874 ± 855 | 18223 ± 38111 | 0.66 ± 0.10 | 0.59 ± 0.24 | 0.31 ± 0.12 | 0.38 ± 0.28 |
| Reference site | 1250* | 152710** | 1 | 1 | 0.11 | 0.28 |

* total content given in μg.kg-1 DM (dry matter) (from BIOSED program)

** from BIOSED program

SD: standard deviation

**Method S1.** Dissecting OP profiles of remote lakes.

In the present study, there was an attempt to select a second reference that consisted in a large-scale OP signature from a remote area. For this aim, a literature overview was performed to collect PAH and PCB profiles from lacustrine media such as surficial sediments, water, air, snow and ice. Within each medium, available profiles were classified into categories according to their location (European, Arctic or Canadian) and their anthropization level (urban or remote). Remote European lakes were selected in alpine or rural sites at the same latitudinal range as Lake Bourget. Profiles in different seasons and years were added when available to prevent potential bias. Moreover, the distinction between the contamination in the gaseous/dissolved and particulate phases of air and water was brought when available; otherwise, they were considered as bulk media. The results from this literature overview are listed in Table S4 and S5.

For the PCBs, seven categories were specified from the literature; remote European sediment, remote Canadian sediment, Arctic sediment, urban European sediment, air, water and snow (Figure S1-A). For the PAHs, twelve categories were gathered from the literature, allowing the distinction between the gaseous/dissolved and particulate phases of the remote European air and urban European water (Figure S2-A).


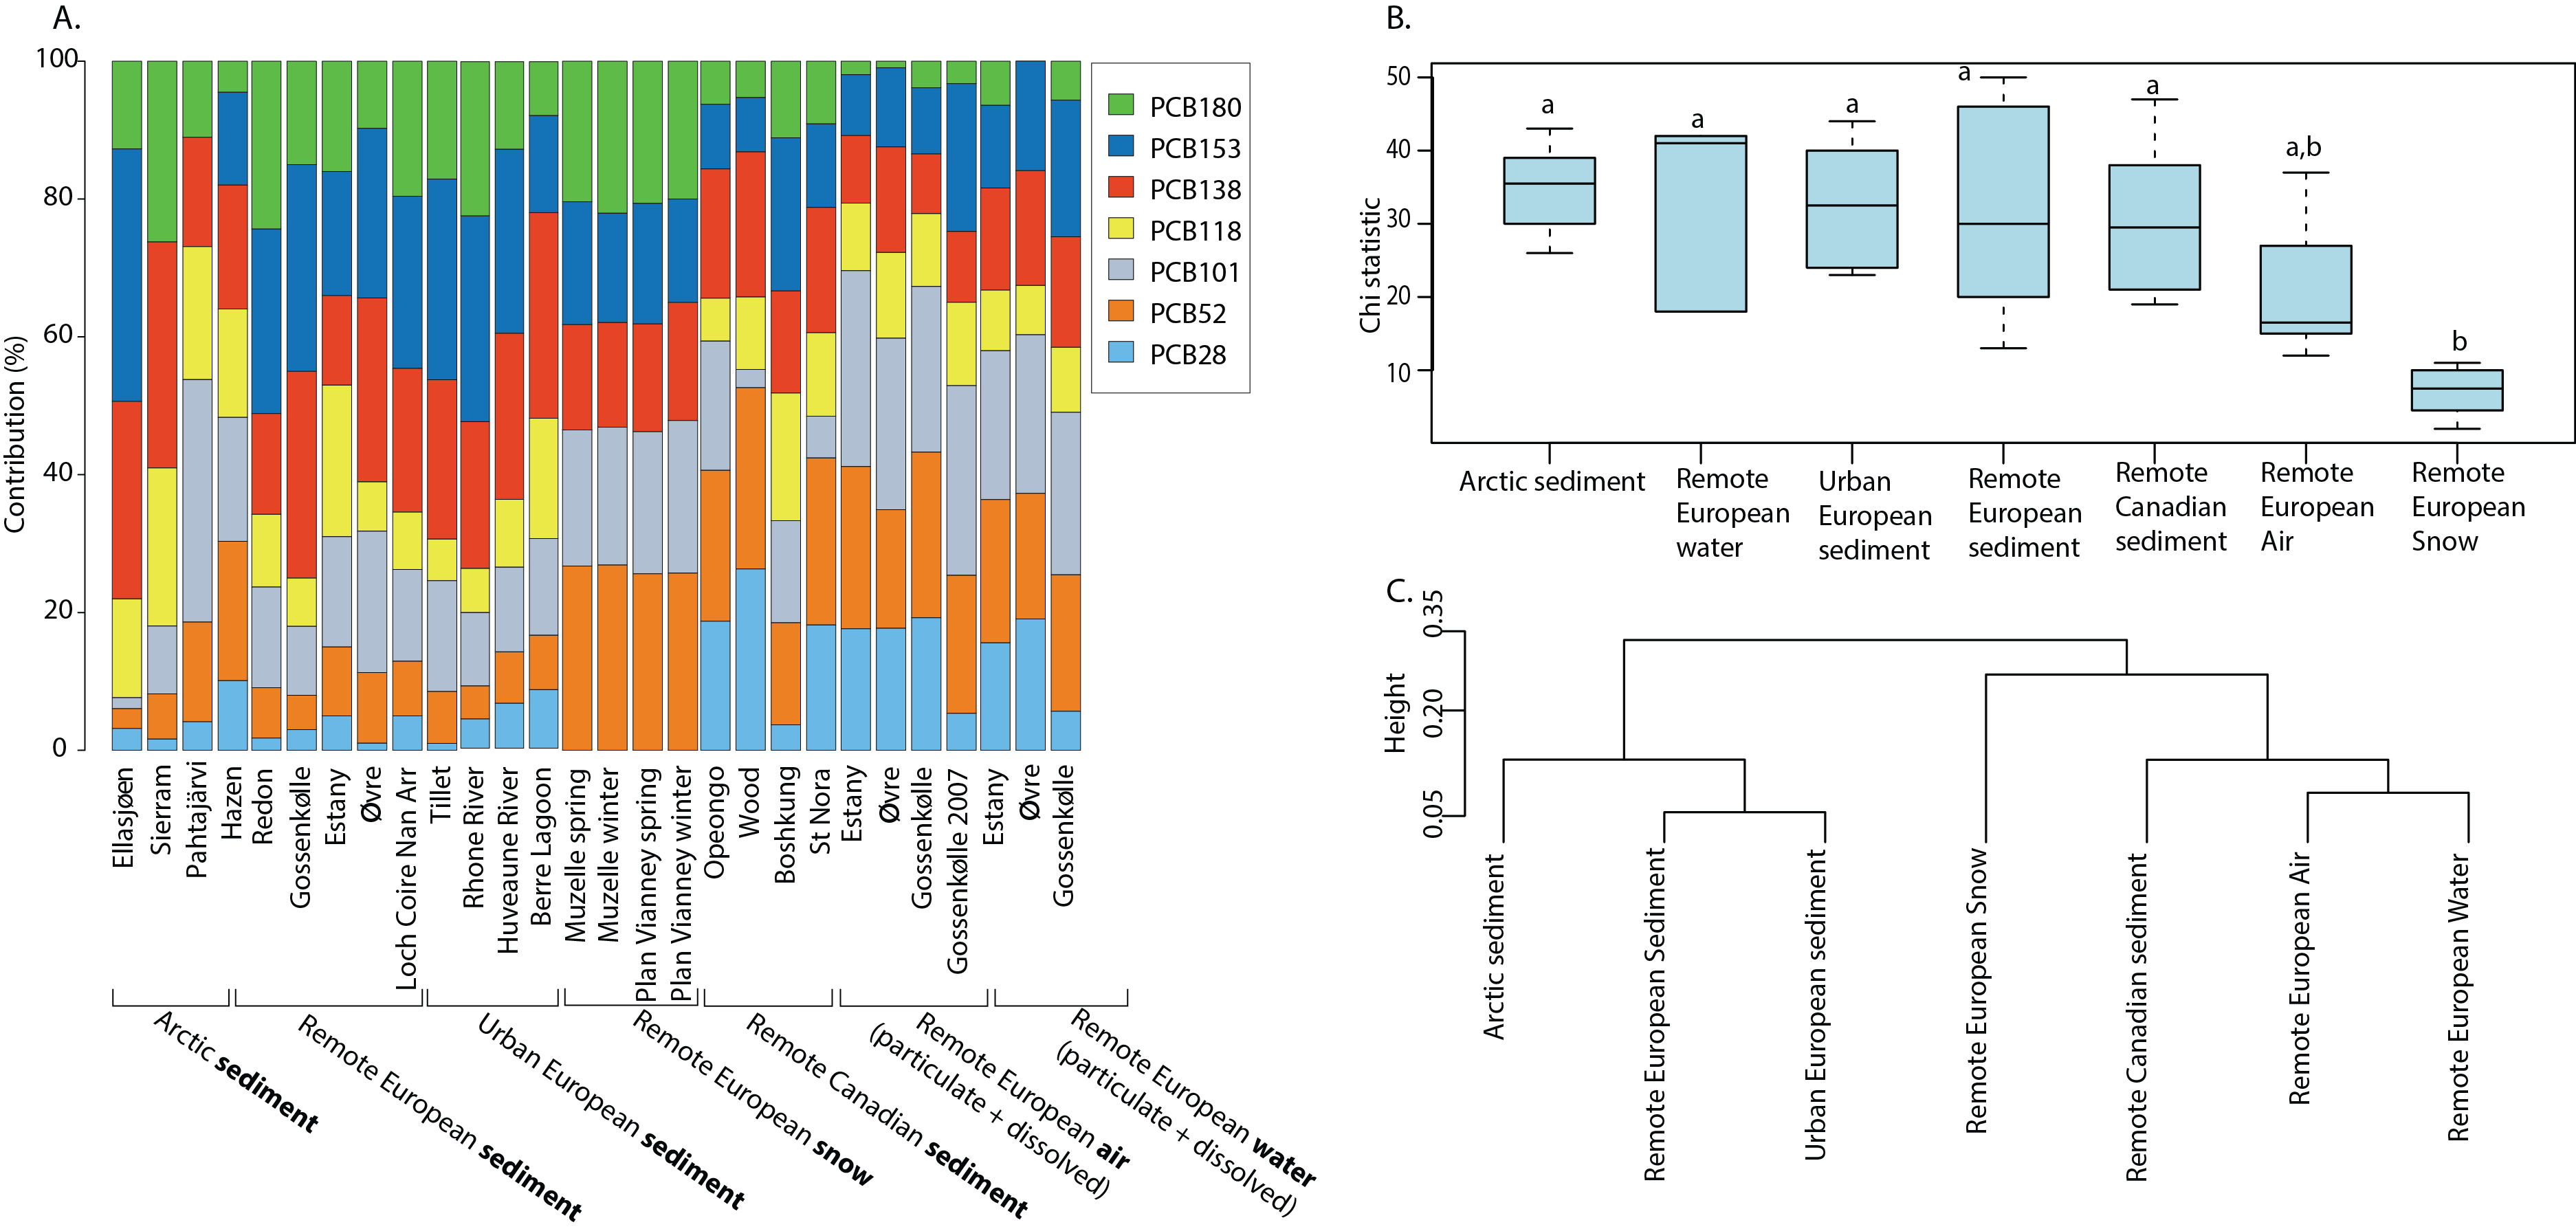


**Figure S1.** Results of the literature search for large-scale PCB profiles including (A) PCB profiles given in abundance (%) of each congener over the sum of the 7 PCBs, (B) Chi2 statistical boxplots of the different compartments based on the individual profiles and (C) dendrogram of the different categories based on Bray-Curtis dissimilarity methods. Different letters in (B) indicate significant differences between the Chi2 results (Kruskal-Wallis tests).


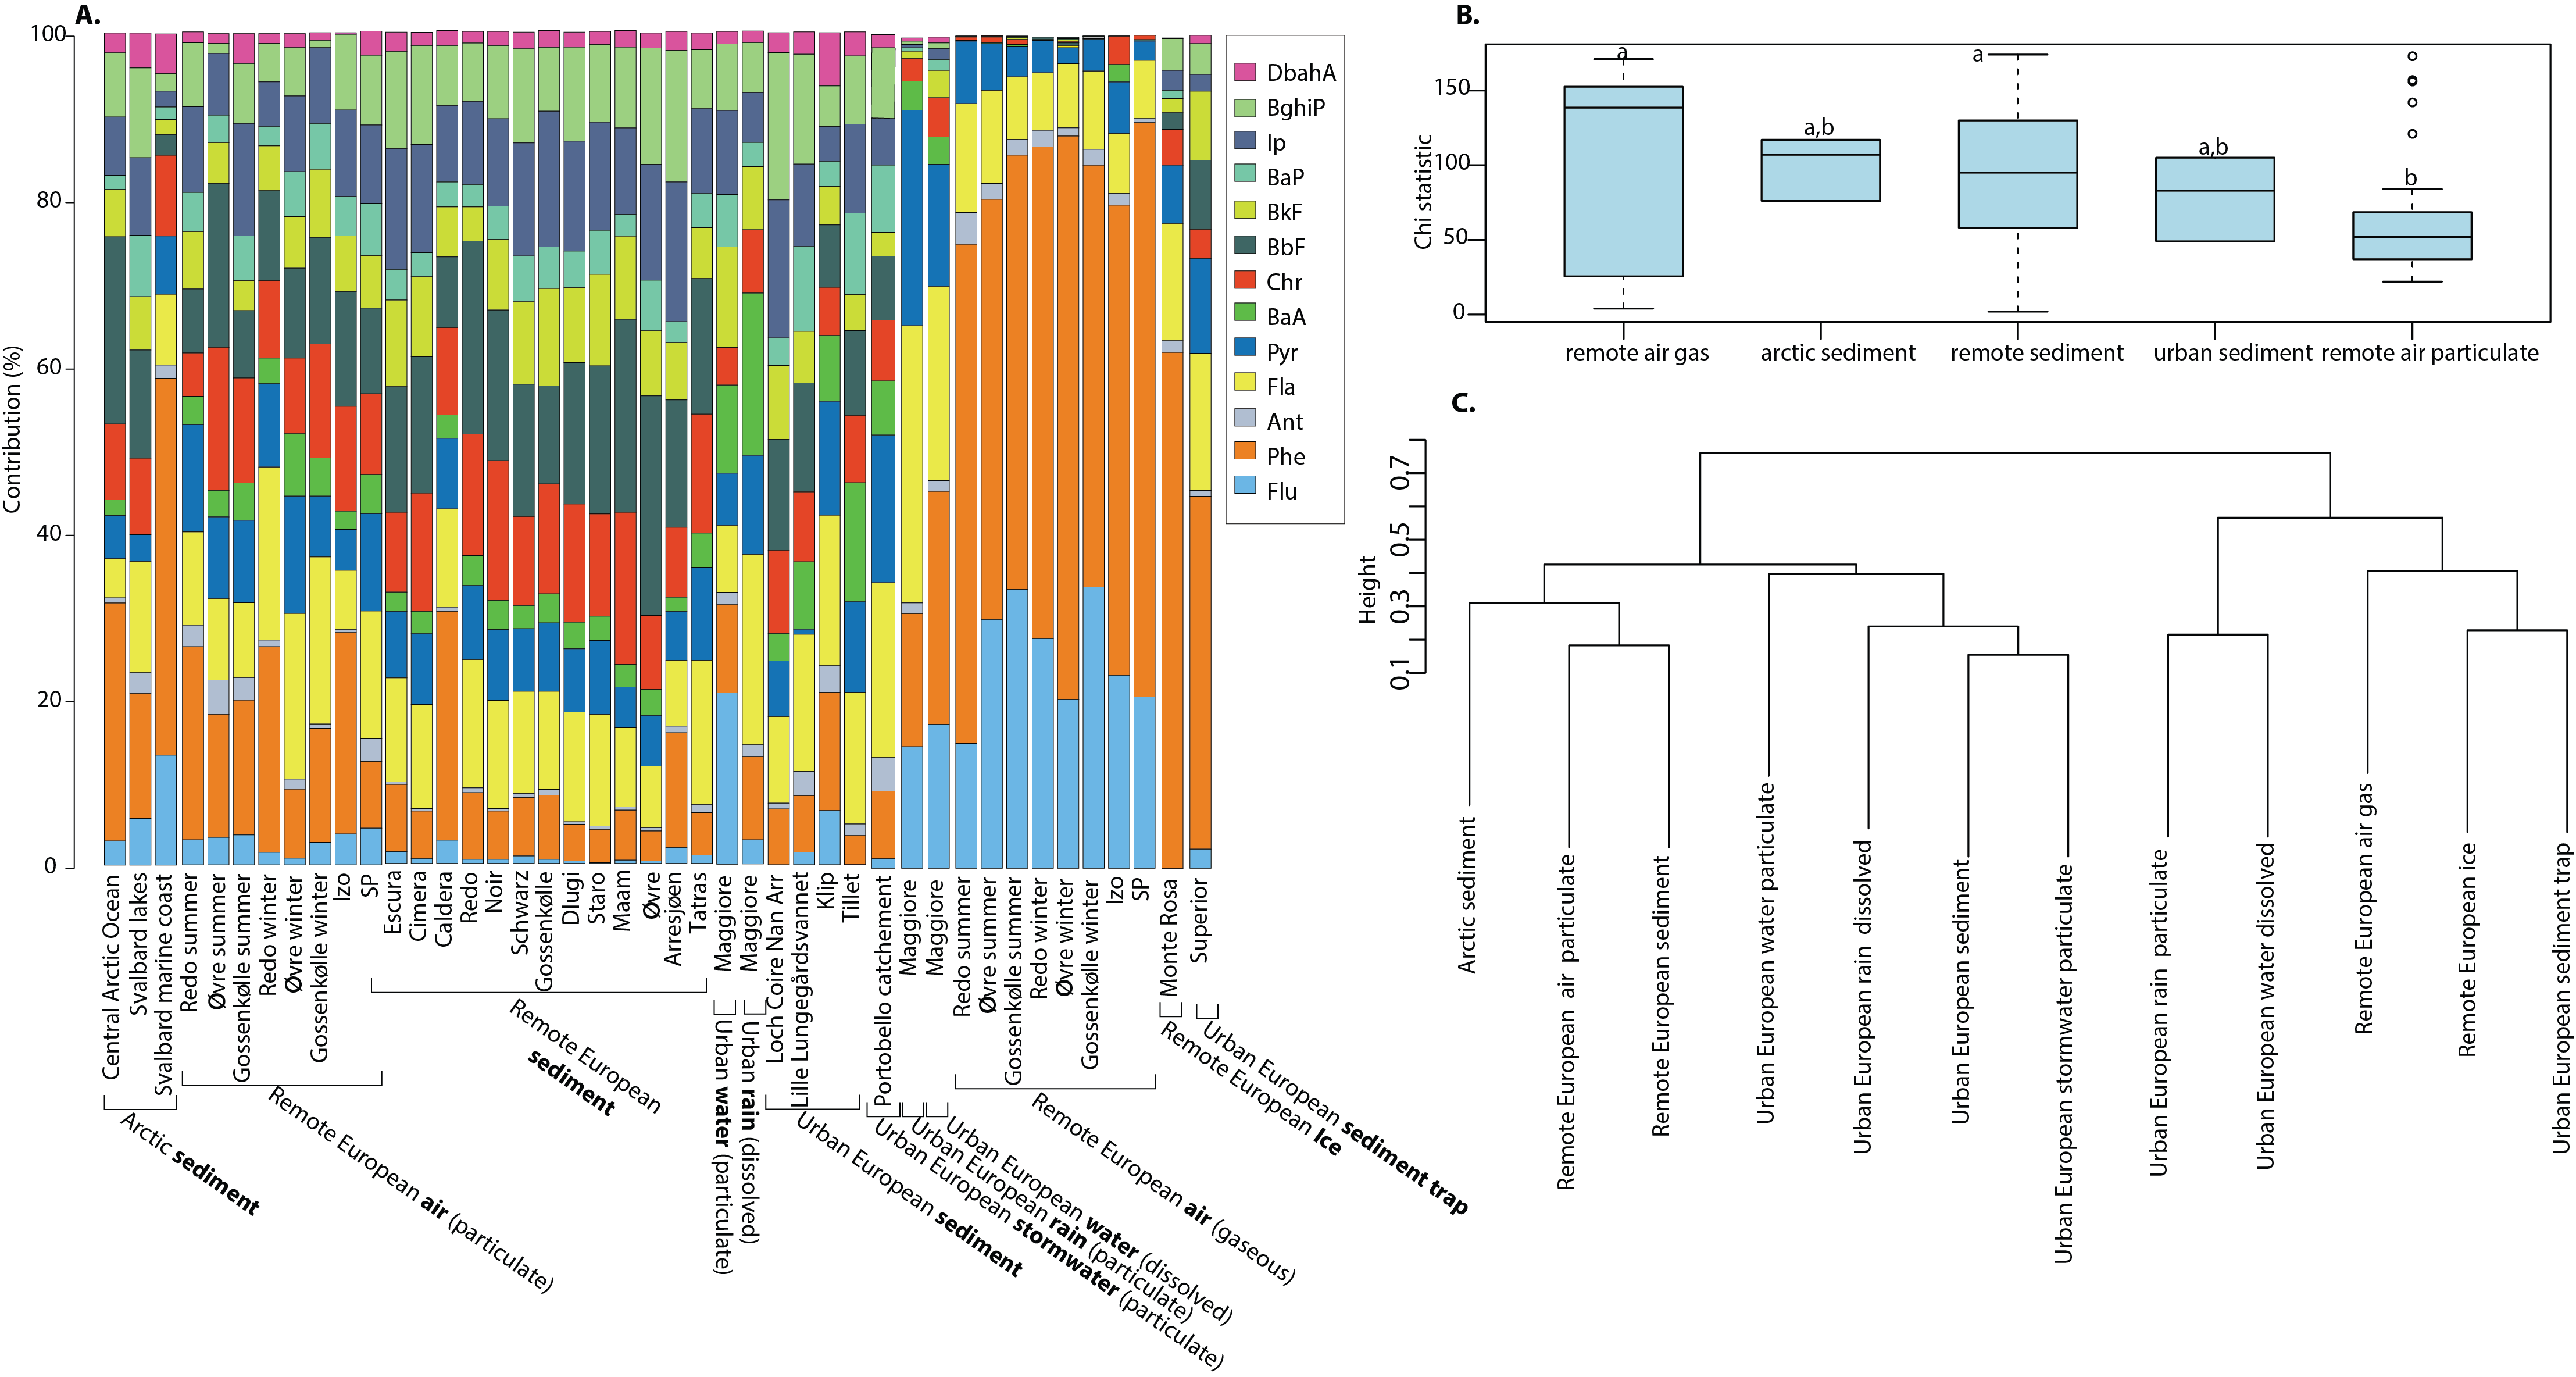


**Figure S2.** Results of the literature search for large-scale PAH profiles including (A) PAH profiles given in abundance (%) of each PAH over the sum of the 13 PAHs, (B) Chi2 statistical boxplots of the different compartments based on these individual profiles and (C) dendrogram of the different compartments based on Bray-Curtis dissimilarity methods. Different letters in (B) indicate significant differences between the Chi2 results (Kruskal-Wallis tests).

For the large-scale reference, PCB and PAH profiles that were searched for remote European lake sediments needed to fulfill the following eligibility criteria; (1) the sediment belonged to a stable category, and (2) it appropriately reflects the large-scale OP signature. To test the validity of the first criterion, the variations between profiles within the different categories were assessed and compared using Chi2 and Kruskal-Wallis tests with the *pgirmess* package (Giraudoux et Giraudoux 2018). The validity of the second criterion was tested by comparing the mean profiles in each category to determine whether the profiles in remote European sediments were similar to those in remote European air and water and different from those in urban European sediments.

The remote sediment and water categories had more heterogeneous OP profiles than the air and snow categories (Figure S1-B and 3-B. Chi2 and Kruskal-Wallis tests. p-value<0.05). Water and sediment can receive OPs from several more pathways other than wet and dry atmospheric deposition, such as lake tributaries or direct runoff, and ice and snow melting that could contribute to the different fractionation of the large-scale OP profile according to the watershed morphologies (i.e.. drainage area to lake surface ratio) of the remote lakes (Yang et al. 2002; Van Metre et Mahler 2004), even without local source influences. Internal lake processes are also susceptible to the control of OP exchanges between water and sediment (Nellier et al. 2015). Lake biota, for example, is assumed to play an important role in water-to-sediment transports of PCBs through the differences in OP assimilations according to species, such as in settling particle fluxes and bioturbation activities (Berglund et al. 2001; Goutte et al. 2013; Reynoldson 1987; Nizzetto et al. 2012). In addition, sediment grain size distribution, organic matter quality and quantity can interfere in the partitioning of OPs between the sediment and the water column, depending on the Kow of the considered OPs (Allen-King, Grathwohl, et Ball 2002; Burgess et al. 2001; Tsapakis, Stephanou, et Karakassis 2003). Altogether, these processes may explain why the mean PCB profile of remote European sediment was more similar to the urban European sediment profile than those of remote European lake water and air (Figure S1-C). The two latter media exhibited higher abundances of more volatile congeners (PCB 28 and 52) than the sediments, suggesting these low Kow congeners may be less efficiently trapped by the sediment than the less-volatile and hydrophobic ones. For PAHs, remote European sediment profiles were similar to those from the particulate phases of air and water (Figure S2-C), which exhibited a predominance of the heavy molecular weight (HMW) PAHs in contrast with the low molecular weight (LMW) enriched profiles from gaseous and dissolved phases. Similar to PCBs, remote lake sediments may act as a more efficient sink for particulate-bound HMW PAHs than dissolved LMW PAHs exhibiting low Kow values (Augusto et al. 2010; Wong et al. 2004; Arzayus, Dickhut, et Canuel 2001). Consequently, the more volatile PAHs and PCBs tend to be transported larger distances until their condensation at cold, high-latitude sites (Wania et Mackay 1993; Blais et al. 1998; Scheringer et al. 2000). This phenomenon would explain why both remote and urban European sediments exhibit similar OP profiles dominated by heavy PCBs and PAHs, while remote Canadian and Arctic sediments at higher latitudes exhibit the reverse profiles and are dominated by light chemicals.

Finally, considering the variability of OP profiles within the remote categories and the resemblance with the urban profiles, the PCB and PAH profiles in remote European sediments did not meet the criteria to appropriately reflect the large-scale signature. This is the reason why sedimentary OP profiles from the urbanized part of the lake Bourget watershed were selected for the rest of this study.

**Table S4**. PAH profiles (%) from the literature overview for the selection of the large-scale reference and the respective literature references

| Site | Categories | Flu | Phe | Ant | Fla | Pyr | BaA | Chr | BbF | BkF | BaP | Ip | BghiP | DbahA | References |
| --- | --- | --- | --- | --- | --- | --- | --- | --- | --- | --- | --- | --- | --- | --- | --- |
| Escura | remote European sediment | 1.4 | 8.1 | 0.3 | 12.5 | 8.0 | 2.3 | 9.6 | 15.1 | 10.4 | 3.7 | 14.5 | 11.7 | 2.3 | (Fernández, Vilanova, et Grimalt 1999) |
| Cimera | remote European sediment | 0.6 | 5.7 | 0.3 | 12.5 | 8.5 | 2.7 | 14.2 | 16.4 | 9.6 | 2.9 | 13.0 | 11.9 | 1.6 |
| Caldera | remote European sediment | 2.8 | 27.5 | 0.5 | 11.8 | 8.5 | 2.8 | 10.5 | 8.5 | 6.0 | 3.0 | 9.2 | 7.2 | 1.8 |
| Redo | remote European sediment | 0.5 | 8.0 | 0.6 | 15.4 | 8.9 | 3.6 | 14.6 | 23.2 | 4.1 | 2.7 | 10.0 | 7.0 | 1.4 |
| Noir | remote European sediment | 0.5 | 5.8 | 0.3 | 13.0 | 8.5 | 3.5 | 16.8 | 18.1 | 8.5 | 4.0 | 10.5 | 8.8 | 1.7 |
| Schwarz | remote European sediment | 0.9 | 7.0 | 0.5 | 12.3 | 7.5 | 2.8 | 10.7 | 15.9 | 9.9 | 5.5 | 13.6 | 11.3 | 2.0 |
| Gossenkølle | remote European sediment | 0.5 | 7.7 | 0.7 | 11.8 | 8.2 | 3.5 | 13.2 | 11.8 | 11.7 | 5.0 | 16.3 | 7.7 | 2.0 |
| Dlugi | remote European sediment | 0.3 | 4.4 | 0.3 | 13.2 | 7.6 | 3.2 | 14.2 | 17.0 | 9.0 | 4.4 | 13.2 | 11.3 | 1.8 |
| Staro | remote European sediment | 0.1 | 4.0 | 0.4 | 13.4 | 8.9 | 2.9 | 12.3 | 17.8 | 11.0 | 5.3 | 13.0 | 9.3 | 1.6 |
| Maam | remote European sediment | 0.4 | 6.0 | 0.4 | 9.5 | 4.9 | 2.7 | 18.3 | 23.2 | 10.0 | 2.6 | 10.4 | 9.7 | 2.0 |
| øvre | remote European sediment | 0.3 | 3.6 | 0.4 | 7.4 | 6.1 | 3.1 | 8.9 | 26.4 | 7.8 | 6.1 | 13.9 | 14.0 | 1.8 |
| Arresjøen | remote European sediment | 1.9 | 13.8 | 0.8 | 7.9 | 5.9 | 1.7 | 8.4 | 15.3 | 6.9 | 2.5 | 16.8 | 15.8 | 2.3 |
| Tatras | remote European sediment | 1.0 | 5.1 | 1.0 | 17.3 | 11.2 | 4.1 | 14.3 | 16.3 | 6.1 | 4.1 | 10.2 | 7.1 | 2.0 | (Fernández et al. 2000) |
| Loch Coire Nan Arr | remote European sediment | NA | 6.7 | 0.7 | 10.4 | 6.7 | 3.3 | 10.0 | 13.3 | 8.9 | 3.3 | 16.6 | 17.7 | 2.4 | (Rose et al. 2005) |
| Lille Lungegårdsvannet | Urban European sediment | 1.5 | 6.8 | 2.9 | 16.5 | 0.6 | 8.1 | 8.4 | 13.1 | 6.2 | 10.2 | 9.9 | 13.2 | 2.7 | (Andersson et al. 2014) |
| Klip | urban European sediment | 6.5 | 14.2 | 3.2 | 18.1 | 13.7 | 7.9 | 5.8 | 7.5 | 4.6 | 3.0 | 4.2 | 4.9 | 6.4 | (Pheiffer et al. 2018) |
| Tillet | urban European sediment | 0.1 | 3.4 | 1.4 | 15.8 | 10.9 | 14.3 | 8.1 | 10.2 | 4.3 | 9.8 | 10.7 | 8.2 | 2.9 | BIOSED program |
| Central arctic ocean | arctic sediment | 2.9 | 28.6 | 0.6 | 4.7 | 5.2 | 1.9 | 9.1 | 22.5 | 5.7 | 1.7 | 7.0 | 7.7 | 2.4 | (Ma et al. 2017) |
| Svalbard lakes | arctic sediment | 5.6 | 15.0 | 2.5 | 13.4 | 3.2 | NA | 9.2 | 13.0 | 6.4 | 7.4 | 9.3 | 10.8 | 4.2 | (Jiao et al. 2009) |
| Svalbard marine coast | arctic sediment | 13.2 | 45.3 | 1.6 | 8.5 | 7.0 | NA | 9.7 | 2.5 | 1.8 | 1.5 | 1.9 | 2.1 | 4.8 |
| Redo summer | remote European air (particulate) | 3.0 | 23.2 | 2.6 | 11.2 | 12.9 | 3.4 | 5.2 | 7.7 | 6.9 | 4.7 | 10.3 | 7.7 | 1.3 | (Fernández et al. 2000) |
| Ovre summer | remote European air (particulate) | 3.3 | 14.8 | 4.1 | 9.8 | 9.8 | 3.2 | 17.2 | 19.7 | 4.9 | 3.3 | 7.4 | 1.2 | 1.2 |
| Gossenkolle summer | remote European air (particulate) | 3.6 | 16.2 | 2.7 | 9.0 | 9.9 | 4.5 | 12.6 | 8.1 | 3.6 | 5.4 | 13.5 | 7.2 | 3.6 |
| Redo winter | remote European air (particulate) | 1.5 | 24.7 | 0.8 | 20.8 | 10.0 | 3.1 | 9.3 | 10.8 | 5.4 | 2.3 | 5.4 | 4.6 | 1.2 |
| Ovre winter | remote European air (particulate) | 0.8 | 8.3 | 1.2 | 19.9 | 14.1 | 7.5 | 9.1 | 10.8 | 6.2 | 5.4 | 9.1 | 5.8 | 1.7 |
| Gossenkølle winter | remote European air (particulate) | 2.7 | 13.7 | 0.5 | 20.1 | 7.3 | 4.6 | 13.7 | 12.8 | 8.2 | 5.5 | 9.1 | 0.9 | 0.9 |
| Izo | remote European air (particulate) | 3.7 | 24.2 | 0.4 | 7.1 | 4.9 | 2.2 | 12.6 | 13.8 | 6.7 | 4.7 | 10.4 | 9.1 | 0.2 | (Drooge et al. 2010) |
| SP | remote European air (particulate) | 4.4 | 8.0 | 2.8 | 15.3 | 11.7 | 4.7 | 9.7 | 10.3 | 6.3 | 6.3 | 9.4 | 8.4 | 2.9 |
| Redo summer | remote European air (gaseous) | 15.0 | 60.0 | 3.8 | 13.1 | 7.5 | 0.1 | 0.4 | 0.1 | ND | 0.0 | 0.0 | 0.0 | 0.0 | (Fernández, Grimalt, et Vilanova 2002) |
| Ovre summer | remote European air (gaseous) | 29.9 | 50.5 | 1.9 | 11.2 | 5.6 | 0.1 | 0.7 | 0.1 | 0.1 | 0.0 | 0.0 | 0.0 | 0.0 |
| Gossenkølle summer | remote European air (gaseous) | 33.5 | 52.2 | 1.9 | 7.5 | 3.7 | 0.2 | 0.6 | 0.2 | 0.0 | 0.2 | 0.0 | 0.0 | 0.0 |
| Redo winter | remote European air (gaseous) | 27.6 | 59.1 | 2.0 | 6.9 | 3.9 | 0.1 | 0.3 | 0.0 | 0.0 | 0.0 | 0.0 | 0.0 | 0.0 |
| Ovre winter | remote European air (gaseous) | 20.3 | 67.7 | 1.0 | 7.7 | 1.9 | 0.3 | 0.3 | 0.2 | 0.2 | 0.1 | 0.1 | 0.1 | 0.0 |
| Gossenkølle winter | remote European air (gaseous) | 33.8 | 50.7 | 1.9 | 9.4 | 3.8 | 0.1 | 0.3 | 0.0 | 0.0 | 0.0 | 0.0 | 0.0 | 0.0 |
| Izo | remote European air (gaseous) | 23.2 | 56.5 | 1.4 | 7.2 | 6.2 | 2.1 | 3.4 | 0.0 | 0.0 | 0.0 | 0.0 | 0.0 | 0.0 | (Drooge et al. 2010) |
| SP | remote European air (gaseous) | 20.6 | 69.0 | 0.5 | 7.0 | 2.3 | 0.2 | 0.5 | 0.0 | 0.0 | 0.0 | 0.0 | 0.0 | 0.0 |
| Monte Rosa | remote European ice | NA | 62.0 | 1.4 | 14.1 | 7.0 | NA | 4.3 | 2.0 | 1.7 | 1.0 | 2.4 | 3.8 | 0.1 | (Gabrieli et al. 2010) |
| Maggiore | urban European water (dissolved) | 17.3 | 28.0 | 1.3 | 23.3 | 14.7 | 3.3 | 4.7 | NA | 3.3 | 1.3 | 1.3 | 0.7 | 0.7 | (Olivella 2006) |
| Maggiore | urban European water (particulate) | 20.6 | 10.6 | 1.5 | 8.0 | 6.3 | 10.6 | 4.5 | NA | 12.1 | 6.3 | 10.1 | 8.0 | 1.5 |
| Maggiore | urban European rain (particulate) | 14.6 | 16.0 | 1.3 | 33.3 | 25.9 | 3.5 | 2.7 | NA | 0.9 | 0.4 | 0.4 | 0.4 | 0.4 |
| Maggiore | urban European rain (dissolved) | 2.9 | 10.0 | 1.4 | 22.9 | 11.9 | 19.5 | 7.6 | NA | 7.6 | 2.9 | 6.0 | 6.0 | 1.4 |
| Superior | urban European sediment trap | 2.3 | 42.4 | 0.7 | 16.5 | 11.4 | NA | 3.5 | 8.3 | 8.3 | NA | 2.0 | 3.7 | 1.0 | (Jeremiason et al. 1998) |

ND = “Non Detected”

NA = “Non Available”

**Table S5.** PCB profiles (%) from the literature overview for the selection of the large-scale reference and the respective literature references

| Site | Categories | PCB28 | PCB52 | PCB101 | PCB118 | PCB138 | PCB153 | PCB180 | References |
| --- | --- | --- | --- | --- | --- | --- | --- | --- | --- |
| Redon | remote European sediment | 1.8 | 7.3 | 14.6 | 10.6 | 14.6 | 26.8 | 24.4 | (Grimalt et al. 2004) |
| Gossenkølle | remote European sediment | 3.0 | 5.0 | 10.0 | 7.0 | 30.0 | 30.0 | 15.0 | (Carrera et al. 2002) |
| Estany | remote European sediment | 5.0 | 10.0 | 16.0 | 22.0 | 13.0 | 18.0 | 16.0 |
| Ovre | remote European sediment | 1.0 | 10.3 | 20.5 | 7.2 | 26.7 | 24.6 | 9.7 |
| Loch Coire nan Arr | remote European sediment | 5.0 | 7.9 | 13.3 | 8.3 | 20.8 | 25.0 | 19.6 | (Rose et Rippey 2002) |
| Opeongo | remote Canadian sediment | 18.8 | 21.9 | 18.8 | 6.3 | 18.8 | 9.4 | 6.3 | (Macdonald et Metcalfe 1991) |
| Wood | remote Canadian sediment | 26.3 | 26.3 | 2.6 | 10.5 | 21.1 | 7.9 | 5.3 |
| Boshkung | remote Canadian sediment | 3.7 | 14.8 | 14.8 | 18.5 | 14.8 | 22.2 | 11.1 |
| St Nora | remote Canadian sediment | 18.2 | 24.2 | 6.1 | 12.1 | 18.2 | 12.1 | 9.1 |
| Tillet | urban European sediment | 1.0 | 7.5 | 16.1 | 6.0 | 23.1 | 29.1 | 17.1 | BIOSED program |
| Rhône | urban European sediment | 4.3 | 4.8 | 10.7 | 6.4 | 21.4 | 29.9 | 22.5 | (Desmet et al. 2012) |
| Huveaune | urban European sediment | 6.6 | 7.5 | 12.3 | 9.9 | 24.2 | 26.8 | 12.8 | (Kanzari et al. 2014) |
| Berre Lagoon | urban European sediment | 8.5 | 7.9 | 14.1 | 17.5 | 30.0 | 14.2 | 7.8 |
| Ellasjøen | arctic sediment | 3.2 | 2.9 | 1.6 | 14.3 | 28.7 | 36.6 | 12.7 | (Evenset et al. 2007) |
| Sierram | arctic sediment | 1.6 | 6.6 | 9.8 | 23.0 | 32.8 | NA | 26.2 | (Vartiainen et al. 1997) |
| Pahtajärvi | arctic sediment | 4.1 | 14.5 | 35.2 | 19.3 | 15.9 | NA | 11.0 |
| Hazen | arctic sediment | 10.1 | 20.2 | 18.0 | 15.7 | 18.0 | 13.5 | 4.5 | (Muir et al. 1996) |
| Estany | remote European air (gaseous + particulate) | 17.6 | 23.5 | 28.4 | 9.8 | 9.8 | 8.8 | 2.0 | (Carrera et al. 2002) |
| Ovre | remote European air (gaseous + particulate) | 17.7 | 17.2 | 24.9 | 12.4 | 15.3 | 11.5 | 1.0 |
| Gossenkølle | remote European air (gaseous + particulate) | 19.2 | 24.0 | 24.0 | 10.6 | 8.7 | 9.6 | 3.8 |
| Gossenkølle 2007 | remote European air (gaseous + particulate) | 5.4 | 20.0 | 27.5 | 12.1 | 10.3 | 21.4 | 3.3 | (Arellano et al. 2015) |
| Muzelle summer | remote European snow | NA | 26.8 | 19.7 | NA | 15.3 | 17.8 | 20.4 | (Nellier et al. 2015) |
| Muzelle winter | remote European snow | NA | 26.9 | 20.0 | NA | 15.2 | 15.9 | 22.1 |
| Plan Vianney summer | remote European snow | NA | 25.6 | 20.6 | NA | 15.6 | 17.5 | 20.6 |
| Plan Vianney winter | Remote European snow | NA | 25.7 | 22.1 | NA | 17.1 | 15.0 | 20.0 |
| Estany | Remote European water (dissolved + particulate) | 15.6 | 20.8 | 21.6 | 8.8 | 14.8 | 12.0 | 6.4 | (Carrera et al. 2002) |
| Ovre | Remote European water (dissolved + particulate) | 19.0 | 18.3 | 23.0 | 7.1 | 16.7 | 15.9 | 0.0 |
| Gossenkølle | Remote European water (dissolved + particulate) | 5.7 | 19.8 | 23.6 | 9.4 | 16.0 | 19.8 | 5.7 |

ND = “Non Detected”

NA = “Non Available”

**Literature**

Allen-King, Richelle M, Peter Grathwohl, et William P Ball. 2002. « New modeling paradigms for the sorption of hydrophobic organic chemicals to heterogeneous carbonaceous matter in soils, sediments, and rocks ». *Advances in Water resources* 25 (8‑12): 985–1016.

Andersson, Malin, Martin Klug, Ola Anfin Eggen, et Rolf Tore Ottesen. 2014. « Polycyclic aromatic hydrocarbons (PAHs) in sediments from lake Lille Lungeg\a ardsvannet in Bergen, western Norway; appraising pollution sources from the urban history ». *Science of The Total Environment* 470: 1160–1172.

Arellano, L, P Fernández, R Fonts, NL Rose, U Nickus, H Thies, E Stuchlík, Lluís Camarero, Jordi Catalan, et JO Grimalt. 2015. « Increasing and decreasing trends of the atmospheric deposition of organochlorine compounds in European remote areas during the last decade ». *Atmospheric Chemistry and Physics* 15 (11): 6069–6085.

Arzayus, Krisa M, Rebecca M Dickhut, et Elizabeth A Canuel. 2001. « Fate of atmospherically deposited polycyclic aromatic hydrocarbons (PAHs) in Chesapeake Bay ». *Environmental science & technology* 35 (11): 2178–2183.

Augusto, Sofia, Cristina Máguas, João Matos, Maria João Pereira, et Cristina Branquinho. 2010. « Lichens as an integrating tool for monitoring PAH atmospheric deposition: A comparison with soil, air and pine needles ». *Environmental Pollution* 158 (2): 483‑89. https://doi.org/10.1016/j.envpol.2009.08.016.

Berglund, Olof, Per Larsson, Göran Ewald, et Lennart Okla. 2001. « The Effect of Lake Trophy on Lipid Content and Pcb Concentrations in Planktonic Food Webs ». *Ecology* 82 (4): 1078‑88. https://doi.org/10.1890/0012-9658(2001)082[1078:TEOLTO]2.0.CO;2.

Blais, Jules M, David W Schindler, Derek CG Muir, Lynda E Kimpe, David B Donald, et Bruno Rosenberg. 1998. « Accumulation of persistent organochlorine compounds in mountains of western Canada ». *Nature* 395 (6702): 585.

Burgess, Robert M, Stephan A Ryba, Mark G Cantwell, et Jennifer L Gundersen. 2001. « Exploratory analysis of the effects of particulate characteristics on the variation in partitioning of nonpolar organic contaminants to marine sediments ». *Water research* 35 (18): 4390–4404.

Carrera, Guillem, Pilar Fernández, Joan O Grimalt, Marc Ventura, Lluis Camarero, Jordi Catalan, Ulrike Nickus, Hansjörg Thies, et Roland Psenner. 2002. « Atmospheric deposition of organochlorine compounds to remote high mountain lakes of Europe ». *Environmental Science & Technology* 36 (12): 2581–2588.

Desmet, Marc, Brice Mourier, Barbara J Mahler, Peter C Van Metre, Gwenaëlle Roux, Henri Persat, Irène Lefèvre, et al. 2012. « Spatial and temporal trends in PCBs in sediment along the lower Rhône River, France ». *Science of the Total Environment* 433: 189–197.

Drooge, Barend Leendert Van, Pilar Fernández, Joan O. Grimalt, Evzen Stuchlík, Carlos J. Torres García, et Emilio Cuevas. 2010. « Atmospheric Polycyclic Aromatic Hydrocarbons in Remote European and Atlantic Sites Located above the Boundary Mixing Layer ». *Environmental Science and Pollution Research* 17 (6): 1207‑16. https://doi.org/10.1007/s11356-010-0296-0.

Evenset, A., G. N. Christensen, J. Carroll, A. Zaborska, U. Berger, D. Herzke, et D. Gregor. 2007. « Historical trends in persistent organic pollutants and metals recorded in sediment from Lake Ellasjøen, Bjørnøya, Norwegian Arctic ». *Environmental Pollution* 146 (1): 196‑205. https://doi.org/10.1016/j.envpol.2006.04.038.

Fernández, Pilar, Joan O Grimalt, et Rosa M Vilanova. 2002. « Atmospheric gas-particle partitioning of polycyclic aromatic hydrocarbons in high mountain regions of Europe ». *Environmental science & technology* 36 (6): 1162–1168.

Fernández, Pilar, Rosa M. Vilanova, et Joan O. Grimalt. 1999. « Sediment Fluxes of Polycyclic Aromatic Hydrocarbons in European High Altitude Mountain Lakes ». *Environmental Science & Technology* 33 (21): 3716‑22. https://doi.org/10.1021/es9904639.

Fernández, Pilar, Rosa M. Vilanova, Carolina Martínez, Peter Appleby, et Joan O. Grimalt. 2000. « The Historical Record of Atmospheric Pyrolytic Pollution over Europe Registered in the Sedimentary PAH from Remote Mountain Lakes ». *Environmental Science & Technology* 34 (10): 1906‑13. https://doi.org/10.1021/es9912271.

Gabrieli, Jacopo, Paul Vallelonga, Giulio Cozzi, Paolo Gabrielli, Andrea Gambaro, Michael Sigl, Fabio Decet, et al. 2010. « Post 17th-century changes of European PAH emissions recorded in high-altitude alpine snow and ice ». *Environmental science & technology* 44 (9): 3260–3266.

Giraudoux, Patrick, et Maintainer Patrick Giraudoux. 2018. « Package ‘pgirmess’ ».

Goutte, A., M. Chevreuil, F. Alliot, O. Chastel, Y. Cherel, M. Eléaume, et G. Massé. 2013. « Persistent organic pollutants in benthic and pelagic organisms off Adélie Land, Antarctica ». *Marine Pollution Bulletin* 77 (1): 82‑89. https://doi.org/10.1016/j.marpolbul.2013.10.027.

Grimalt, Joan O, Barend L van Drooge, Alejandra Ribes, Rosa M Vilanova, Pilar Fernandez, et Peter Appleby. 2004. « Persistent organochlorine compounds in soils and sediments of European high altitude mountain lakes ». *Chemosphere* 54 (10): 1549–1561.

Jeremiason, Jeff D, Steven J Eisenreich, Joel E Baker, et Brian J Eadie. 1998. « PCB decline in settling particles and benthic recycling of PCBs and PAHs in Lake Superior ». *Environmental science & technology* 32 (21): 3249–3256.

Jiao, Liping, Gene J Zheng, Tu Binh Minh, Bruce Richardson, Liqi Chen, Yuanhui Zhang, Leo W Yeung, et al. 2009. « Persistent toxic substances in remote lake and coastal sediments from Svalbard, Norwegian Arctic: levels, sources and fluxes ». *Environmental Pollution* 157 (4): 1342–1351.

Kanzari, F, AD Syakti, L Asia, L Malleret, A Piram, G Mille, et P Doumenq. 2014. « Distributions and sources of persistent organic pollutants (aliphatic hydrocarbons, PAHs, PCBs and pesticides) in surface sediments of an industrialized urban river (Huveaune), France ». *Science of the Total Environment* 478: 141–151.

Ma, Yuxin, Crispin J Halsall, Zhiyong Xie, Danijela Koetke, Wenying Mi, Ralf Ebinghaus, et Guoping Gao. 2017. « Polycyclic aromatic hydrocarbons in ocean sediments from the North Pacific to the Arctic Ocean ». *Environmental Pollution* 227: 498–504.

Macdonald, CR, et CD Metcalfe. 1991. « Concentration and distribution of PCB congeners in isolated Ontario lakes contaminated by atmospheric deposition ». *Canadian Journal of Fisheries and Aquatic Sciences* 48 (3): 371–381.

Muir, Derek CG, Alex Omelchenko, Norbert P Grift, Dan A Savoie, W Lyle Lockhart, Paul Wilkinson, et Gregg J Brunskill. 1996. « Spatial trends and historical deposition of polychlorinated biphenyls in Canadian midlatitude and Arctic lake sediments ». *Environmental science & technology* 30 (12): 3609–3617.

Nellier, Yann-Michel, Marie-Elodie Perga, Nathalie Cottin, Philippe Fanget, Emmanuel Malet, et Emmanuel Naffrechoux. 2015. « Mass budget in two high altitude lakes reveals their role as atmospheric PCB sinks ». *Science of The Total Environment* 511 (avril): 203‑13. https://doi.org/10.1016/j.scitotenv.2014.12.052.

Nizzetto, Luca, Rosalinda Gioia, Jun Li, Katrine Borgå, Francesco Pomati, Roberta Bettinetti, Jordi Dachs, et Kevin C Jones. 2012. « Biological pump control of the fate and distribution of hydrophobic organic pollutants in water and plankton ». *Environmental science & technology* 46 (6): 3204–3211.

Olivella, M Àngels. 2006. « Polycyclic aromatic hydrocarbons in rainwater and surface waters of Lake Maggiore, a subalpine lake in Northern Italy ». *Chemosphere* 63 (1): 116–131.

Pheiffer, Wihan, Laura P Quinn, Hindrik Bouwman, Nico J Smit, et Rialet Pieters. 2018. « Polycyclic aromatic hydrocarbons (PAHs) in sediments from a typical urban impacted river: application of a comprehensive risk assessment ». *Ecotoxicology*, 1–16.

Reynoldson, Trefor B. 1987. « Interactions between Sediment Contaminants and Benthic Organisms ». In *Ecological Effects of In Situ Sediment Contaminants*, 53‑66. Developments in Hydrobiology. Springer, Dordrecht. https://doi.org/10.1007/978-94-009-4053-6_6.

Rose, Neil L, et Brian Rippey. 2002. « The historical record of PAH, PCB, trace metal and fly-ash particle deposition at a remote lake in north-west Scotland ». *Environmental Pollution* 117 (1): 121‑32. https://doi.org/10.1016/S0269-7491(01)00149-X.

Rose, Neil L., Handong Yang, Pilar Fernández, et Joan O. Grimait. 2005. « Trace Metals, Fly-Ash Particles and Persistent Organic Pollutants in European Remote Mountain Lakes ». In *Global Change and Mountain Regions*, édité par Uli M. Huber, Harald K. M. Bugmann, et Mel A. Reasoner, 123‑32. Advances in Global Change Research 23. Springer Netherlands. https://doi.org/10.1007/1-4020-3508-X_13.

Scheringer, Martin, Fabio Wegmann, Kathrin Fenner, et Konrad Hungerbühler. 2000. « Investigation of the cold condensation of persistent organic pollutants with a global multimedia fate model ». *Environmental Science & Technology* 34 (9): 1842–1850.

Tsapakis, Manolis, Euripides G. Stephanou, et Ioannis Karakassis. 2003. « Evaluation of atmospheric transport as a nonpoint source of polycyclic aromatic hydrocarbons in marine sediments of the Eastern Mediterranean ». *Marine Chemistry* 80 (4): 283‑98. https://doi.org/10.1016/S0304-4203(02)00132-9.

Van Metre, Peter C, et Barbara J Mahler. 2004. « Contaminant trends in reservoir sediment cores as records of influent stream quality ». *Environmental science & technology* 38 (11): 2978–2986.

Vartiainen, T., J. Mannio, M. Korhonen, K. Kinnunen, et T. Strandman. 1997. « Levels of PCDD, PCDF and PCB in dated lake sediments in Subarctic Finland ». *Chemosphere*, Chlorinated Dioxins, PCB and Related Compounds 1995, 34 (5): 1341‑50. https://doi.org/10.1016/S0045-6535(97)00431-1.

Wania, Frank, et Donald Mackay. 1993. « Global fractionation and cold condensation of low volatility organochlorine compounds in polar regions ». *Ambio*, 10–18.

Wong, Fiona, Tom Harner, Qin-Tao Liu, et Miriam L Diamond. 2004. « Using experimental and forest soils to investigate the uptake of polycyclic aromatic hydrocarbons (PAHs) along an urban-rural gradient ». *Environmental Pollution* 129 (3): 387‑98. https://doi.org/10.1016/j.envpol.2003.12.006.

Yang, Handong, Neil L Rose, Richard W Battarbee, et John F Boyle. 2002. « Mercury and lead budgets for Lochnagar, a Scottish mountain lake and its catchment ». *Environmental science & technology* 36 (7): 1383–1388.
